# Supplementary material for: Lack of training as a central barrier to the promotion of smoking cessation: a survey among general practitioners in Germany
Source: Oxford University Press journal article supplement (doi:10.1093/eurpub/cki123), 2005-03-08
Supplement: cki123_Supplementary_Data.zip [file cki123_Supplementary_Data.zip]

Archive with 1 entries (1 files):
- cki123_supp_data.pdf
