# Supplementary material for: Lack of training as a central barrier to the promotion of smoking cessation: a survey among general practitioners in Germany
Source: Oxford University Press journal article supplement (doi:10.1093/eurpub/cki123), 2005-03-08
Supplement: cki123_Supplementary_Data.zip [file cki123_Supplementary_Data.zip › cki123_supp_data.pdf]

The PDF for this paper did not appear online on 8 March 2005, as in error, the PDF for a different paper was uploaded (EJPH Advance Access published on 22 February 2005, doi:10.1093/ejph/cki121). The correct PDF appeared online on 16 March 2005. The publisher would like to apologise for this technical error.
